## CORRECTION

# Correction: Neuroenhancement and neuroprotection by oral solution citicoline in non-arteritic ischemic optic neuropathy as a model of neurodegeneration: A randomized pilot study

The *PLOS ONE* Staff

Due to a typesetting error, incorrect versions of [Fig 3](#) and its corresponding caption are included in this article [1]. The publisher apologizes for the error. Please see the correct [Fig 3](#) and caption here.

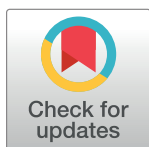

## OPEN ACCESS

**Citation:** The *PLOS ONE* Staff (2019) Correction: Neuroenhancement and neuroprotection by oral solution citicoline in non-arteritic ischemic optic neuropathy as a model of neurodegeneration: A randomized pilot study. *PLoS ONE* 14(8): e0221313. <https://doi.org/10.1371/journal.pone.0221313>

**Published:** August 14, 2019

**Copyright:** © 2019 The PLOS ONE Staff. This is an open access article distributed under the terms of the [Creative Commons Attribution License](#), which permits unrestricted use, distribution, and reproduction in any medium, provided the original author and source are credited.

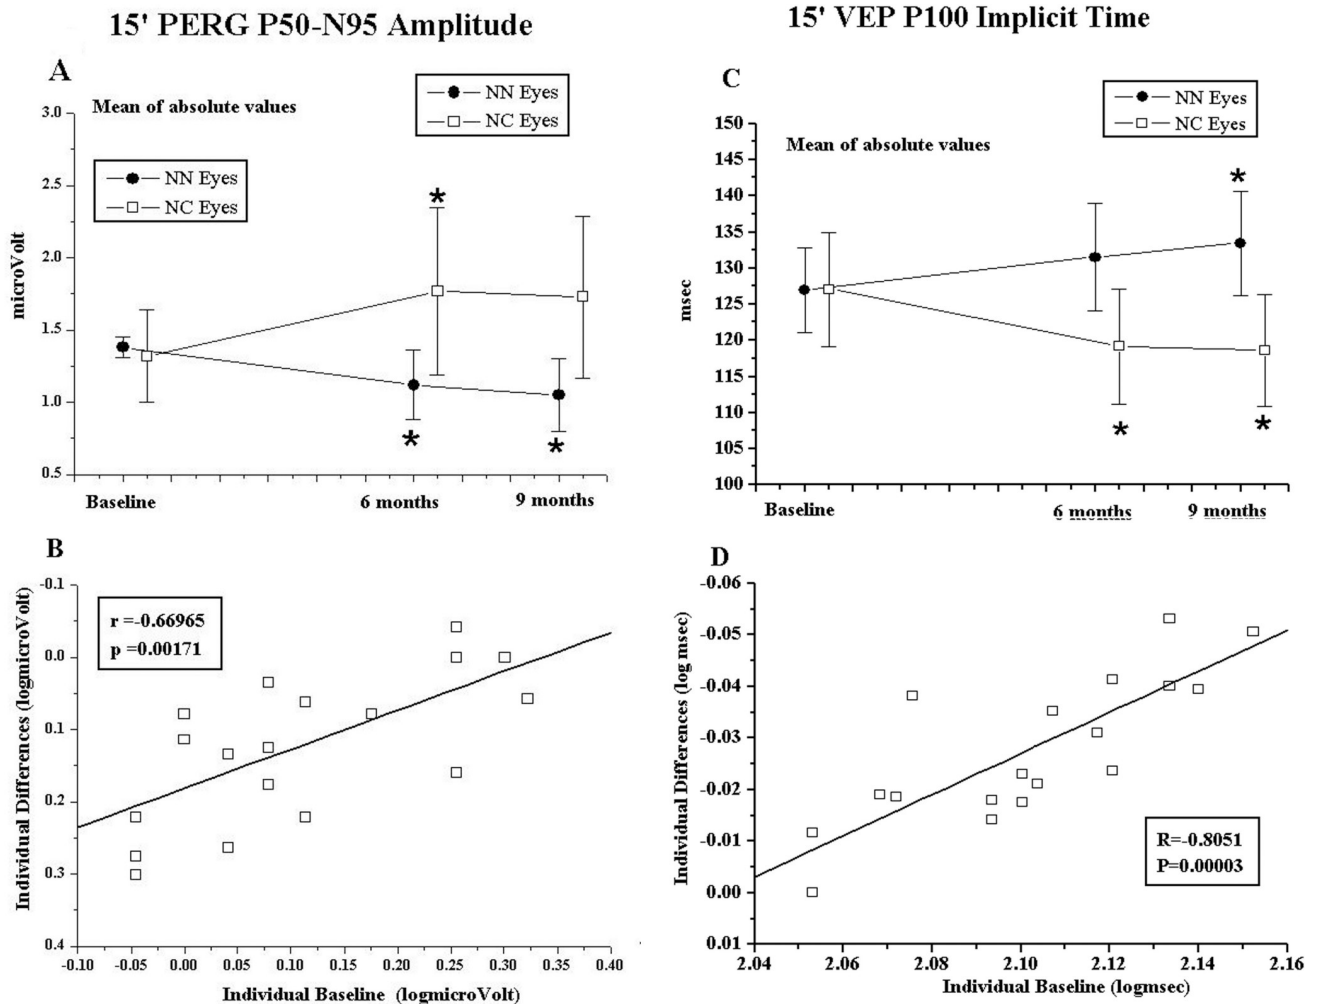

**Fig 3. Pattern electroretinogram (PERG) and visual evoked potentials (VEP) P100 implicit time recorded in response to 15' checks (15') results. (A)** Mean of absolute PERG P50-N95 Amplitude values observed in NC and NN Groups. \* = ANOVA,  $p < 0.01$  in NN and NC Groups with respect to baseline. Vertical lines: one mean standard deviation. The statistical evaluation is reported in S2 Table. **(B)** Individual PERG P50-N95 Amplitude values observed in NC eyes at baseline plotted as a function of the values of the corresponding differences at the end of treatment (6 months minus baseline). Pearson's test was used for regression analysis and linear correlation. **(C)** Mean of absolute VEP P100 implicit time values observed in NC and NN Groups. \* = ANOVA,  $p < 0.01$  in NN and NC Groups with respect to baseline. Vertical lines: one mean standard deviation. Statistical evaluation is reported in "S2 Table". **(D)** Individual VEP P100 implicit time values observed in NC eyes at baseline plotted as a function of the values of the corresponding differences at the end of treatment (6 months minus baseline). Pearson's test was used for regression analysis and linear correlation.

<https://doi.org/10.1371/journal.pone.0221313.g001>

## Reference

1. Parisi V, Barbano L, Di Renzo A, Coppola G, Ziccardi L (2019) Neuroenhancement and neuroprotection by oral solution citicoline in non-arteritic ischemic optic neuropathy as a model of neurodegeneration: A randomized pilot study. PLoS ONE 14(7): e0220435. <https://doi.org/10.1371/journal.pone.0220435> PMID: 31348806
